# Supplementary material for: Effective Improvement of the Oxidative Stability of Acer truncatum Bunge Seed Oil, a New Woody Oil Food Resource, by Rosemary Extract
Source: MDPI journal article supplement (doi:10.3390/antiox12040889), 2023-04-06
Supplement: s1 [file s1]

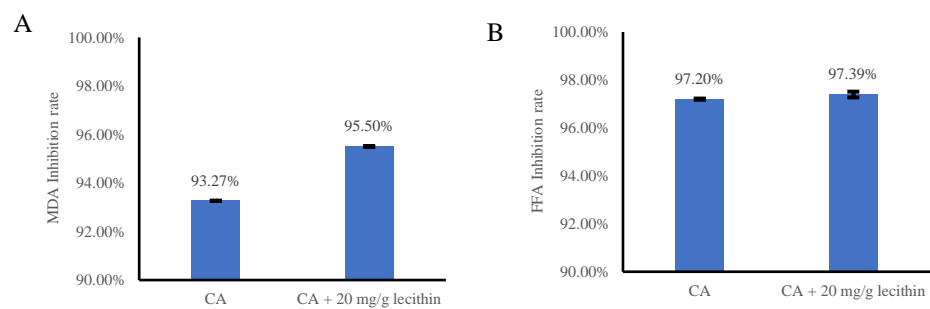

**Figure S4.** Improvement of the oxidative stability of Aoil by enrichment with lecithin-CA. (A), MDA Inhibition rate. (B), FFA Inhibition rate.
