# Supplementary material for: Effective Improvement of the Oxidative Stability of Acer truncatum Bunge Seed Oil, a New Woody Oil Food Resource, by Rosemary Extract
Source: MDPI journal article supplement (doi:10.3390/antiox12040889), 2023-04-06
Supplement: s1 [file s1]

**Table S2.** Elution procedure.

| Time/min | Mobile phase A (%) | Mobile phase B (%) |
|----------|--------------------|--------------------|
| 0        | 90                 | 10                 |
| 1        | 90                 | 10                 |
| 8        | 10                 | 90                 |
| 13       | 10                 | 90                 |
| 13.5     | 90                 | 10                 |
| 16       | 90                 | 10                 |
