# Supplementary material for: Effective Improvement of the Oxidative Stability of Acer truncatum Bunge Seed Oil, a New Woody Oil Food Resource, by Rosemary Extract
Source: MDPI journal article supplement (doi:10.3390/antiox12040889), 2023-04-06
Supplement: s1 [file s1]

**Table S3.** Fatty acid composition of Aoil.

| Fatty acid composition (g/100 g) |                  |
|----------------------------------|------------------|
| C4:0                             | -                |
| C6:0                             | 0.002 ± 0.0001   |
| C8:0                             | 0.006 ± 0.0006   |
| C10:0                            | 0.003 ± 0.0006   |
| C11:0                            | -                |
| C12:0                            | 0.005 ± 0.0043   |
| C13:0                            | -                |
| C14:0                            | 0.018 ± 0.0016   |
| C14:1                            | -                |
| C15:0                            | 0.004 ± 0.0007   |
| C15:1                            | -                |
| C16:0                            | 4.413 ± 0.0352   |
| C16:1                            | 0.092 ± 0.0015   |
| C17:0                            | 0.066 ± 0.001    |
| C17:1                            | -                |
| C18:0                            | 2.536 ± 0.0141   |
| C18:1, trans(n9)                 | -                |
| C18:1, cis(n9)                   | 11.940 ± 0.14    |
| C18:2, trans(n6)                 | -                |
| C18:2, cis(n6)                   | 34.859 ± 0.2436  |
| C18:3 n6                         | -                |
| C18:3 n3                         | 2.839 ± 0.0228   |
| C20:0                            | 0.263 ± 0.0028   |
| C20:1 n9                         | 8.236 ± 0.0606   |
| C20:2                            | 0.284 ± 0.0014   |
| C21:0                            | 0.006 ± 0.0007   |
| C20:3 n6                         | -                |
| C20:4 n6                         | 0.013 ± 0.0007   |
| C20:3 n3                         | 0.006 ± 0.0002   |
| C20:5 n3                         | -                |
| C22:0                            | 0.453 ± 0.0037   |
| C22:1                            | 17.775 ± 0.1936  |
| C22:2                            | 0.024 ± 0.0007   |
| C23:0                            | 0.030 ± 0.0012   |
| C24:0                            | 0.379 ± 0.0071   |
| C22:6 n3                         | -                |
| C24:1                            | 6.327 ± 0.1549   |
| ΣSFA                             | 8.1837 ± 0.0666  |
| ΣMUFA                            | 44.3712 ± 0.4951 |
| ΣPUFA                            | 38.0257 ± 0.2653 |

Σ SFA: total saturated fatty acids, ΣMUFA: total monounsaturated fatty acids, ΣPUFA: total polyunsaturated fatty acids
