# Supplementary material for: Effective Improvement of the Oxidative Stability of Acer truncatum Bunge Seed Oil, a New Woody Oil Food Resource, by Rosemary Extract
Source: MDPI journal article supplement (doi:10.3390/antiox12040889), 2023-04-06
Supplement: s1 [file s1]

**Table S1.** 37 fatty acid standards.

| Number | Fatty acid       |
|--------|------------------|
| 1      | C4:0             |
| 2      | C6:0             |
| 3      | C8:0             |
| 4      | C10:0            |
| 5      | C11:0            |
| 6      | C12:0            |
| 7      | C13:0            |
| 8      | C14:0            |
| 9      | C14:1            |
| 10     | C15:0            |
| 11     | C15:1            |
| 12     | C16:0            |
| 13     | C16:1            |
| 14     | C17:0            |
| 15     | C17:1            |
| 16     | C18:0            |
| 17     | C18:1, trans(n9) |
| 18     | C18:1, cis(n9)   |
| 19     | C18:2, trans(n6) |
| 20     | C18:2, cis(n6)   |
| 21     | C18:3 n6         |
| 22     | C18:3 n3         |
| 23     | C20:0            |
| 24     | C20:1 n9         |
| 25     | C20:2            |
| 26     | C21:0            |
| 27     | C20:3 n6         |
| 28     | C20:4 n6         |
| 29     | C20:3 n3         |
| 30     | C20:5 n3         |
| 31     | C22:0            |
| 32     | C22:1            |
| 33     | C22:2            |

34 C23:0

35 C24:0

36 C22:6 n3

37 C24:1

---
