# Supplementary material for: Effective Improvement of the Oxidative Stability of Acer truncatum Bunge Seed Oil, a New Woody Oil Food Resource, by Rosemary Extract
Source: MDPI journal article supplement (doi:10.3390/antiox12040889), 2023-04-06
Supplement: s1 [file s1]

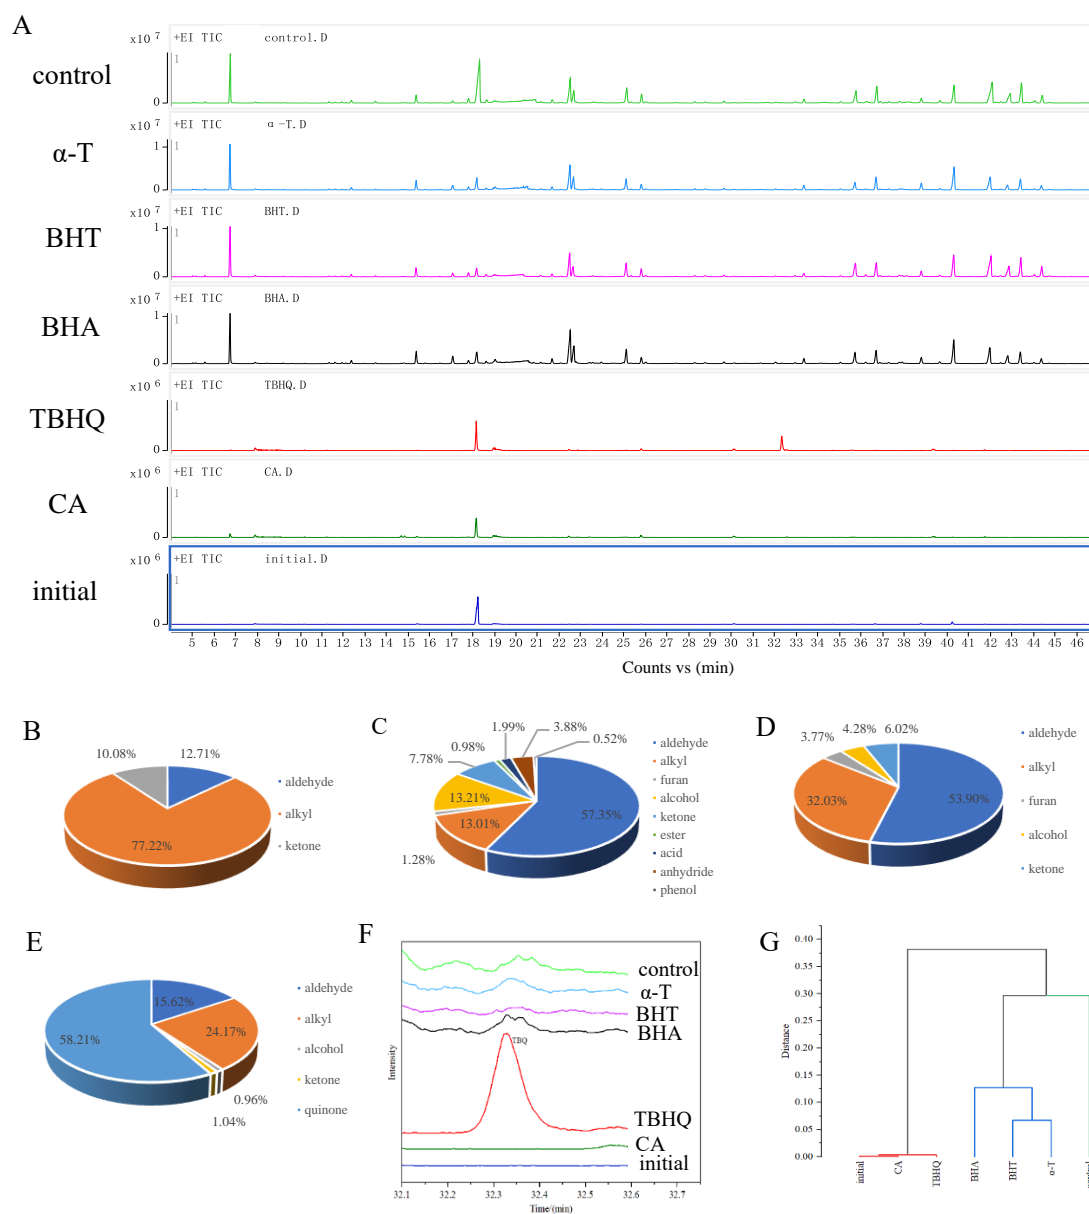

**Figure S3.** SPME–GC–MS spectrum of 1 g Aoil at the beginning and storage at 60 °C for 30 d (A). Volatile lipid oxidation products types of Aoil at the beginning (B) and after oxidation for 30 d (C). Volatile lipid oxidation products types of Aoil enriched with CA (D) and TBHQ (E). SPME–GC–MS spectrum of TBQ at the beginning and storage at 60 °C for 30 d (F). Dendrogram of volatiles (G).
