# Supplementary material for: Effective Improvement of the Oxidative Stability of Acer truncatum Bunge Seed Oil, a New Woody Oil Food Resource, by Rosemary Extract
Source: MDPI journal article supplement (doi:10.3390/antiox12040889), 2023-04-06
Supplement: s1 [file s1]

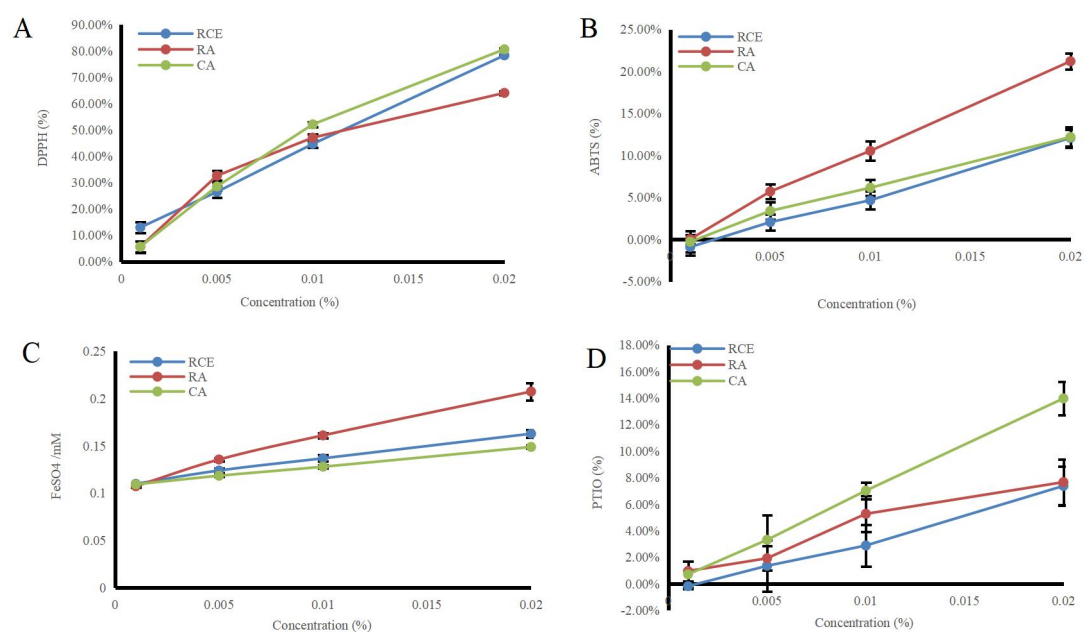

**Figure S2.** Antioxidant activities of different concentrations of RCE, RA and CA. Determination of the antioxidant activity by DPPH (A), ABTS (B), FRAP (C), and PTIO (D).
