# Supplementary figures and images for: Effective Improvement of the Oxidative Stability of Acer truncatum Bunge Seed Oil, a New Woody Oil Food Resource, by Rosemary Extract
Source: MDPI journal article supplement (doi:10.3390/antiox12040889), 2023-04-06

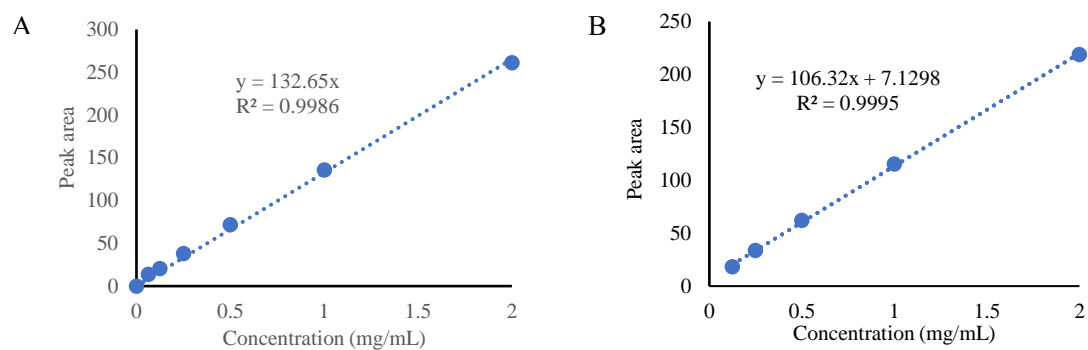

**Figure S1.** Standards curve for RA(A) and CA (B).

Supplement: s1 [file s1]
